# Supplementary material for: Prediction of RNA binding proteins comes of age from low resolution to high resolution
Source: Royal Society of Chemistry journal article supplement (doi:10.1039/c3mb70167k), 2013-06-19
Supplement: c3mb70167k.pdf [file c3mb70167k.pdf]

## Supplement Table for Prediction of RNA binding proteins comes of age from low resolution to high resolution

Huiying Zhao,<sup>a</sup> Yuedong Yang<sup>a</sup> and Yaoqi Zhou<sup>\*a</sup>

<sup>a</sup>School of Informatics, Indiana University Purdue University, Indianapolis, Indiana 46202, USA; Center for Computational Biology and Bioinformatics, Indiana University School of Medicine, Indianapolis, Indiana 46202, USA

\*Email: yqzhou@iupui.edu

Table S1 Method Performance based on published results

| Author/Method Name [Ref.]       | #RBPs | Sensitivity | Specificity | Accuracy | MCC   | Validation                                  |
|---------------------------------|-------|-------------|-------------|----------|-------|---------------------------------------------|
| <b>Structure-based</b>          |       |             |             |          |       |                                             |
| Jeong et al. <sup>1</sup>       | 96    | -           | -           | 59.1     | 0.52  | 10-fold CV                                  |
| KYG <sup>2</sup>                | 86    | -           | 50          | 80       | -     | Jack-knife                                  |
| Chen and Lim <sup>3</sup>       | 69    | 51          | -           | -        | -     | Independent test                            |
| Maetschke and Yuan <sup>4</sup> | 144   | 58          | 85          | -        | 0.38  | 5-fold CV                                   |
| Struct-NB <sup>5</sup>          | 147   | 35.9        | 44.3        | -        | -     | Sequence-based CV                           |
| Li et al. <sup>6</sup>          | 107   | 87.8        | 93.4        | -        | 0.47  | 6-fold CV                                   |
| OPRA <sup>7</sup>               | 12    | -           | -           | -        | -     | Excluding homology by 70% sequence identity |
| Liu et al. <sup>8</sup>         | 205   | -           | -           | 84.5     | -     | 5 fold CV                                   |
| SPalign <sup>9*</sup>           | 257   | 40          | 91          | 73       | 0.34  | Independent Test                            |
| SPOT-Struc <sup>10*</sup>       | 77    | 75          | 96          | 93       | 0.72  | Excluding homology by 30% sequence identity |
| <b>Sequence-based</b>           |       |             |             |          |       |                                             |
| BindN <sup>11</sup>             | 25    | 66.3        | 69.8        | 69.3     | 0.27  | 5-fold CV                                   |
| RNABindR <sup>12</sup>          | 147   | 37          | 90          | 85.5     | -     | Independent test                            |
| Pprint <sup>13</sup>            | 86    | 70.1        | 75.5        | 75.4     | 0.32  | 5-fold CV                                   |
| RNAProB <sup>14</sup>           | 147   | 77.7        | 71.1        | 74.4     | 0.49  | 5-fold CV                                   |
| BindN+ <sup>15</sup>            | 25    | 77.7        | 71.6        | 78.7     | 0.39  | 5-fold CV                                   |
| NAPS <sup>16</sup>              | 109   | 75          | 77          | 76       | 0.52  | 10-fold CV                                  |
| PBRpred <sup>17</sup>           | 48    | -           | -           | -        | 0.51  | 5-fold CV                                   |
| PiRaNhA <sup>18</sup>           | 81    | 56.3        | 92.8        | 87.2     | 0.499 | Independent test                            |
| PRBR <sup>19</sup>              | 180   | 53.7        | 96.97       | 88.63    | 0.563 | Independent test                            |
| SPOT-Seq <sup>20</sup>          | 116   | 53          | 93          | 85       | 0.47  | Excluding homology by 30% sequence identity |

1. E. Jeong, I. F. Chung and S. Miyano, *Genome informatics. International Conference on Genome Informatics*, 2004, **15**, 105-116.
2. O. T. Kim, K. Yura and N. Go, *Nucleic acids research*, 2006, **34**, 6450-6460.
3. Y. C. Chen and C. Lim, *Nucleic acids research*, 2008, **36**, e29.
4. S. R. Maetschke and Z. Yuan, *BMC Bioinformatics*, 2009, **10**, 341.
5. F. Towfic, C. Caragea, D. C. Gemperline, D. Dobbs and V. Honavar, *International Journal of Data Mining and Bioinformatics*, 2010, **4**, 21-43.
6. Q. Li, Z. X. Cao and H. Y. Liu, *Protein Peptide Lett*, 2010, **17**, 287-296.
7. L. Perez-Cano, A. Solernou, C. Pons and J. Fernandez-Recio, *Pac Symp Biocomput*, 2010, **15**, 269-280.
8. Z. P. Liu, L. Y. Wu, Y. Wang, X. S. Zhang and L. Chen, *Bioinformatics*, 2010, **26**, 1616-1622.
9. Y. Yang, J. Zhan, H. Zhao and Y. Zhou, *Proteins*, 2012, **80**, 2080-2088.
10. H. Zhao, Y. Yang and Y. Zhou, *Nucleic Acids Res*, 2011, **39**, 3017-3025.
11. L. Wang and S. J. Brown, *Nucleic acids research*, 2006, **34**, W243-248.
12. M. Terribilini, J. D. Sander, J. H. Lee, P. Zaback, R. L. Jernigan, V. Honavar and D. Dobbs, *Nucleic acids research*, 2007, **35**, W578-584.
13. M. Kumar, A. M. Gromiha and G. P. S. Raghava, *Proteins*, 2008, **71**, 189-194.
14. C. W. Cheng, E. C. Y. Su, J. K. Hwang, T. Y. Sung and W. L. Hsu, *BMC Bioinformatics*, 2008, **9**.
15. L. Wang, C. Huang, M. Q. Yang and J. Y. Yang, *BMC systems biology*, 2010, **4 Suppl 1**, S3.
16. M. B. Carson, R. Langlois and H. Lu, *Nucleic Acids Research*, 2010, **38**, W431-W435.
17. T. Zhang, H. Zhang, K. Chen, J. S. Ruan, S. Y. Shen and L. Kurgan, *Curr Protein Pept Sc*, 2010, **11**, 609-628.
18. Y. Murakami, R. V. Spriggs, H. Nakamura and S. Jones, *Nucleic acids research*, 2010, **38**, W412-416.
19. X. Ma, J. Guo, J. S. Wu, H. D. Liu, J. F. Yu, J. M. Xie and X. A. Sun, *Proteins*, 2011, **79**, 1230-1239.
20. H. Zhao, Y. Yang and Y. Zhou, *RNA Biology*, 2011, **8**, 988-996.
